# Supplementary material for: Template and surfactant free synthesis of hierarchical WO3·0.33H2O via a facile solvothermal route for photocatalytic RhB degradation
Source: Royal Society of Chemistry journal article supplement (doi:10.1039/c4ce00361f), 2014-01-01
Supplement: c4ce00361f1.pdf [file c4ce00361f1.pdf]

Electronic Supplementary Information (ESI)

# **Template and surfactant free synthesis of hierarchical WO<sub>3</sub>·0.33H<sub>2</sub>O via a facile solvothermal route for photocatalytic RhB degradation**

**Yi Zheng, Gang Chen,\* Yaoguang Yu, Jian Pei, and Haiming Xu**

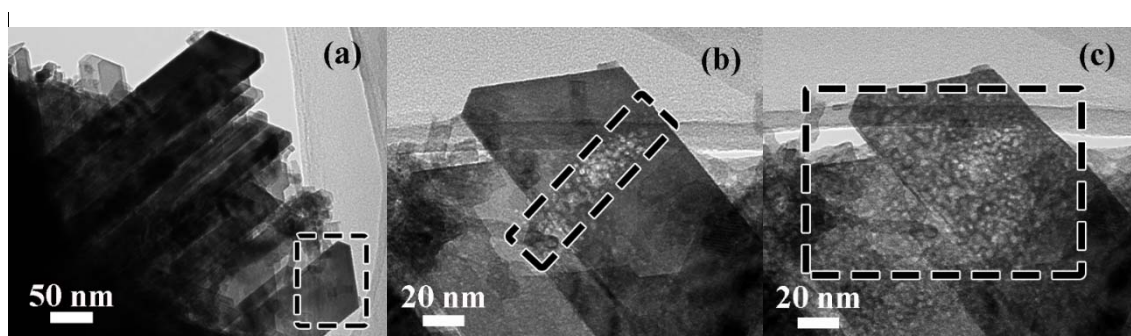

Fig. S1 surface of the sample aperture appeared with the extension of the electron beam irradiation time, due to loss of crystal water.

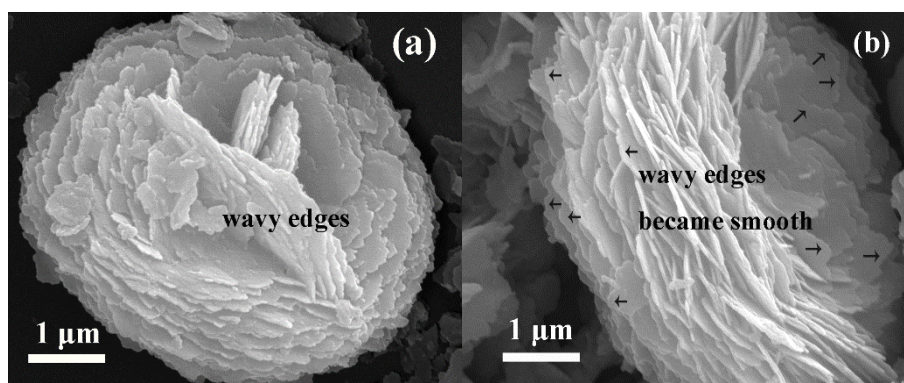

Fig. S2 WF1 sample, (a) reaction time is 3h. (b) reaction time is 5h. Wavy edges of petals begun become smooth prolong the reaction time.

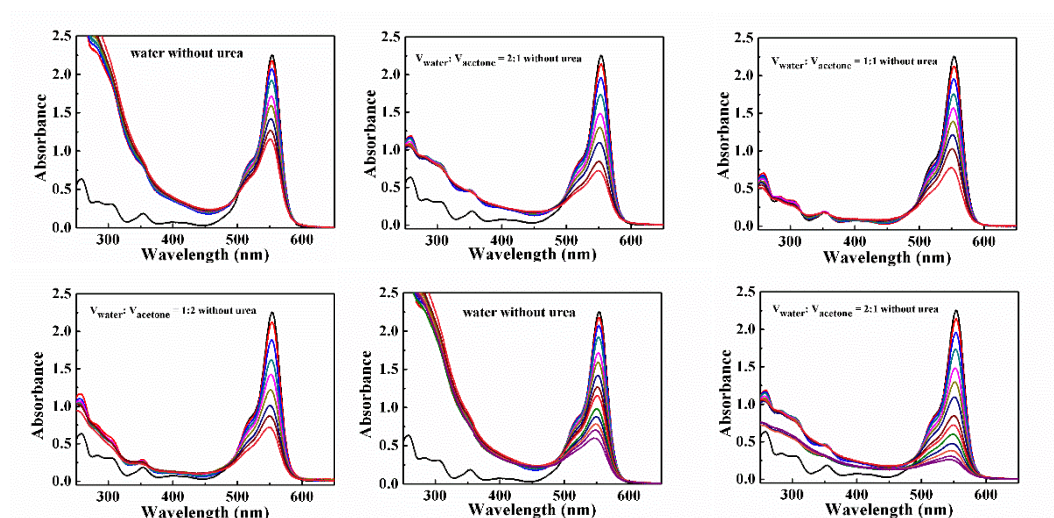

Fig. S3 UV-vis adsorption spectral changes of the RhB solution ( $10 \text{ mg}\cdot\text{L}^{-1}$ ) over as-prepared samples by simulated sunlight irradiation.
